# Supplementary material for: Genome-wide association mapping and genomic prediction for late blight and potato cyst nematode resistance in potato (Solanum tuberosum L.)
Source: Front Plant Sci. 2023 Oct 4;14:1211472. doi: 10.3389/fpls.2023.1211472 (PMC10582711; doi:10.3389/fpls.2023.1211472)
Supplement: Supplementary file 1 [file Table_1.xlsx]

## Sheet: all accessions
Table S1a: Total list of the accessions used for phenotyping in different years
Sl No	CPNUMBER	VARIETY NAME	COUNTRY	SOURCE
1	CP1038	UNKNOWN	UNKNOWN	ICAR-CPRI
2	CP1864	UNKNOWN	UNKNOWN	ICAR-CPRI
3	CP4593	UNKNOWN	UNKNOWN	ICAR-CPRI
4	CP4594	UNKNOWN	UNKNOWN	ICAR-CPRI
5	CP4596	UNKNOWN	UNKNOWN	ICAR-CPRI
6	CP655	UNKNOWN	UNKNOWN	ICAR-CPRI
7	CP658	UNKNOWN	UNKNOWN	ICAR-CPRI
8	CP659	UNKNOWN	UNKNOWN	ICAR-CPRI
9	CP1012	UNKNOWN	UNKNOWN	ICAR-CPRI
10	CP1137	UNKNOWN	UNKNOWN	ICAR-CPRI
11	CP1140	UNKNOWN	UNKNOWN	ICAR-CPRI
12	CP1143	UNKNOWN	UNKNOWN	ICAR-CPRI
13	CP1151	UNKNOWN	UNKNOWN	ICAR-CPRI
14	CP1157	UNKNOWN	UNKNOWN	ICAR-CPRI
15	CP1159	UNKNOWN	UNKNOWN	ICAR-CPRI
16	CP1175	UNKNOWN	UNKNOWN	ICAR-CPRI
17	CP1177	UNKNOWN	UNKNOWN	ICAR-CPRI
18	CP1187	UNKNOWN	UNKNOWN	ICAR-CPRI
19	CP1215	UNKNOWN	UNKNOWN	ICAR-CPRI
20	CP1218	UNKNOWN	UNKNOWN	ICAR-CPRI
21	CP1225	UNKNOWN	UNKNOWN	ICAR-CPRI
22	CP1235	UNKNOWN	UNKNOWN	ICAR-CPRI
23	CP1246	UNKNOWN	UNKNOWN	ICAR-CPRI
24	CP1263	UNKNOWN	UNKNOWN	ICAR-CPRI
25	CP1291	UNKNOWN	UNKNOWN	ICAR-CPRI
26	CP1302	UNKNOWN	UNKNOWN	ICAR-CPRI
27	CP1304	UNKNOWN	UNKNOWN	ICAR-CPRI
28	CP1319	UNKNOWN	UNKNOWN	ICAR-CPRI
29	CP1325	UNKNOWN	UNKNOWN	ICAR-CPRI
30	CP1326	UNKNOWN	UNKNOWN	ICAR-CPRI
31	CP1330	UNKNOWN	UNKNOWN	ICAR-CPRI
32	CP1335	UNKNOWN	UNKNOWN	ICAR-CPRI
33	CP1347	MIRKA	CZE	ICAR-CPRI
34	CP1348	ADINA	AUS	ICAR-CPRI
35	CP1367	B922-6	USA	ICAR-CPRI
36	CP1368	B3428-20	USA	ICAR-CPRI
37	CP1379	96-56	USA	ICAR-CPRI
38	CP1390	B 3620-1	USA	ICAR-CPRI
39	CP1395	B3627-18	USA	ICAR-CPRI
40	CP1399	ARI	NET	ICAR-CPRI
41	CP1402	BEA	NET	ICAR-CPRI
42	CP1405	CLIMAX	NET	ICAR-CPRI
43	CP1411	GLORIA	NET	ICAR-CPRI
44	CP1414	IRENE	NET	ICAR-CPRI
45	CP1418	MARITTA	NET	ICAR-CPRI
46	CP1420	MEERSTER	NET	ICAR-CPRI
47	CP1426	PROF.BROEKEMA	NET	ICAR-CPRI
48	CP1427	PROFIJT	NET	ICAR-CPRI
49	CP1428	RECORD	NET	ICAR-CPRI
50	CP1431	RIVAL	NET	ICAR-CPRI
51	CP1433	SIENTJE	NET	ICAR-CPRI
52	CP1435	TEDRIA	NET	ICAR-CPRI
53	CP1440	BD-1456c(1)	UK	ICAR-CPRI
54	CP1447	CONCHITA	UK	ICAR-CPRI
55	CP1450	SACO	NZE	ICAR-CPRI
56	CP1453	AMSEL	GDR	ICAR-CPRI
57	CP1454	ARGO	GDR	ICAR-CPRI
58	CP1462	SPATZ	GDR	ICAR-CPRI
59	CP1468	ALLERFRUHESTE GELBE	ITA	ICAR-CPRI
60	CP1470	JIIUECA	USR	ICAR-CPRI
61	CP1479	B-751-119	USA	ICAR-CPRI
62	CP1480	B927-3	USA	ICAR-CPRI
63	CP1486	B3692-4	USA	ICAR-CPRI
64	CP1491	BD3053-18	USA	ICAR-CPRI
65	CP1529	2305a(10)	UK	ICAR-CPRI
66	CP1533	2601d(22)	UK	ICAR-CPRI
67	CP1538	M124-2	UK	ICAR-CPRI
68	CP1544	ASOKA	NET	ICAR-CPRI
69	CP1545	SASKIA	NET	ICAR-CPRI
70	CP1553	CX737-579	NOR	ICAR-CPRI
71	CP1555	PIMPERNELX 42NO.174	NOR	ICAR-CPRI
72	CP1559	UNKNOWN	UNKNOWN	ICAR-CPRI
73	CP1564	B4829-7	USA	ICAR-CPRI
74	CP1571	B5036-40	USA	ICAR-CPRI
75	CP1581	PI222948	USA	ICAR-CPRI
76	CP1584	ZEEBURGER	USA	ICAR-CPRI
77	CP1588	COSIMA	GFR	ICAR-CPRI
78	CP1597	B4830-19	USA	ICAR-CPRI
79	CP1602	B5030-10	USA	ICAR-CPRI
80	CP1616	835a(4)	UK	ICAR-CPRI
81	CP1619	1563c(14)	UK	ICAR-CPRI
82	CP1633	2182ef(7)	UK	ICAR-CPRI
83	CP1642	TONDRA	GFR	ICAR-CPRI
84	CP1646	MPI52.504	GFR	ICAR-CPRI
85	CP1653	STOLOVYJ-19	USR	ICAR-CPRI
86	CP1659	ECLIPSE	UK	ICAR-CPRI
87	CP1662	PENTLAND CROWN	UK	ICAR-CPRI
88	CP1664	ROYAL KIDNEY	UK	ICAR-CPRI
89	CP1667	KERR'S PINK	IRE	ICAR-CPRI
90	CP1669	ANTINEMA	GFR	ICAR-CPRI
91	CP1672	ULSTER TORCH	IRE	ICAR-CPRI
92	CP1673	DR.MCINTOSH	IRE	ICAR-CPRI
93	CP1674	BRASOVEAN	ROM	ICAR-CPRI
94	CP1685	FUNDY	CAN	ICAR-CPRI
95	CP1687	GREEN MOUNTAIN	CAN	ICAR-CPRI
96	CP1688	HUNTER	CAN	ICAR-CPRI
97	CP1689	HURON	CAN	ICAR-CPRI
98	CP1700	AURA	FRA	ICAR-CPRI
99	CP1706	FARFADETTE	FRA	ICAR-CPRI
100	CP1710	KER PONDY	FRA	ICAR-CPRI
101	CP1711	MADOZ	FRA	ICAR-CPRI
102	CP1730	Ia 1111-8	USA	ICAR-CPRI
103	CP1735	WIS X 143	USA	ICAR-CPRI
104	CP1736	PI 161695-1	USA	ICAR-CPRI
105	CP1747	EARLY GEM	USA	ICAR-CPRI
106	CP1749	KENNEBEC	USA	ICAR-CPRI
107	CP1753	MERRIMACK	USA	ICAR-CPRI
108	CP1764	RUSSET RURAL	USA	ICAR-CPRI
109	CP1771	US SD.41956	USA	ICAR-CPRI
110	CP1784	ARRAN VICTORY	CAN	ICAR-CPRI
111	CP1800	318.1	USA	ICAR-CPRI
112	CP1802	DEODARA	GDR	ICAR-CPRI
113	CP1806	TUNIKA	GDR	ICAR-CPRI
114	CP1824	62.66/1	GFR	ICAR-CPRI
115	CP1827	ICA PURPCE	COL	ICAR-CPRI
116	CP1835	F 5208	CAN	ICAR-CPRI
117	CP1846	CHIEFTAIN	USA	ICAR-CPRI
118	CP1868	HILLA	GDR	ICAR-CPRI
119	CP1869	NO-NOVA	GDR	ICAR-CPRI
120	CP1871	4085(6)	UK	ICAR-CPRI
121	CP1873	GARMA	AFG	ICAR-CPRI
122	CP1881	ABNAKI	USA	ICAR-CPRI
123	CP1884	B 5408-2	USA	ICAR-CPRI
124	CP1889	B 5665-7	USA	ICAR-CPRI
125	CP1918	B 6595-5(a)	USA	ICAR-CPRI
126	CP1922	B 6603-12	USA	ICAR-CPRI
127	CP1926	B 6712-2	USA	ICAR-CPRI
128	CP1971	SATURNA	NET	ICAR-CPRI
129	CP1947	1512c(16)	UK	ICAR-CPRI
130	CP1982	SAPHIR	GFR	ICAR-CPRI
131	CP1988	66.1044/112	GFR	ICAR-CPRI
132	CP1989	68.625/74	GFR	ICAR-CPRI
133	CP1990	H-345VD(F)8749B	GFR	ICAR-CPRI
134	CP2010	AMR- 69-1	MEX	ICAR-CPRI
135	CP2011	CIP676082	MEX	ICAR-CPRI
136	CP2029	UNKNOWN	UNKNOWN	ICAR-CPRI
137	CP2030	G 6246	PER	ICAR-CPRI
138	CP2049	MEX-32	PER	ICAR-CPRI
139	CP2059	CIP379389	PER	ICAR-CPRI
140	CP2061	CIP379391	PER	ICAR-CPRI
141	CP2065	BR 69.84	PER	ICAR-CPRI
142	CP2071	BR63-5	PER	ICAR-CPRI
143	CP2086	374110-7	PER	ICAR-CPRI
144	CP2089	CIP279099	PER	ICAR-CPRI
145	CP2090	9212.1	FRA	ICAR-CPRI
146	CP2110	CFK69.1	PER	ICAR-CPRI
147	CP2118	DESIREE	NET	ICAR-CPRI
148	CP2163	CRUZA148	PER	ICAR-CPRI
149	CP2142	KUFRI DEWA	IND	ICAR-CPRI
150	CP2149	KUFRI LALIMA	IND	ICAR-CPRI
151	CP2165	BR63.76	PER	ICAR-CPRI
152	CP2171	MS-IC.6	PER	ICAR-CPRI
153	CP2183	I-1039	PER	ICAR-CPRI
154	CP2189	CI-4-343	USA	ICAR-CPRI
155	CP2224	UNKNOWN	UNKNOWN	ICAR-CPRI
156	CP2235	U 567/33	USA	ICAR-CPRI
157	CP2284	BREMER	AUS	ICAR-CPRI
158	CP2285	COLIBAN	AUS	ICAR-CPRI
159	CP2321	CHAUCHA	PER	ICAR-CPRI
160	CP2324	UGRO-SHIRI	PER	ICAR-CPRI
161	CP2335	ICA SIRENA	PER	ICAR-CPRI
162	CP2338	PRISCA	PER	ICAR-CPRI
163	CP2339	GARANA	PER	ICAR-CPRI
164	CP2346	F-6	PER	ICAR-CPRI
165	CP2347	GASORE	PER	ICAR-CPRI
166	CP2348	STINA	SWE	ICAR-CPRI
167	CP2350	GEMSEG	CAN	ICAR-CPRI
168	CP2368	TS-2	PER	ICAR-CPRI
169	CP2370	MUZIRANZARA	PER	ICAR-CPRI
170	CP2385	AND-69-1	PER	ICAR-CPRI
171	CP2399	LLAMEINA BLANCA	PER	ICAR-CPRI
172	CP2412	MURCA	PER	ICAR-CPRI
173	CP2418	CHIQUITA	PER	ICAR-CPRI
174	CP2927	UNKNOWN	PER	ICAR-CPRI
175	CP3036	BOLONA	PER	ICAR-CPRI
176	CP3044	UNKNOWN	UNKNOWN	ICAR-CPRI
177	CP3068	ICA NEVADA	PER	ICAR-CPRI
178	CP3091	NICOLA	NET	ICAR-CPRI
179	CP3079	BINTJE	PER	ICAR-CPRI
180	CP3081	2070(54)	GFR	ICAR-CPRI
181	CP3096	CURIPAMBA	PER	ICAR-CPRI
182	CP3098	27/15	PER	ICAR-CPRI
183	CP3102	LINLESH	PER	ICAR-CPRI
184	CP3103	AZUL SOUCCO	PER	ICAR-CPRI
185	CP3116	EE-786	PER	ICAR-CPRI
186	CP3124	CIP 379676.3	PER	ICAR-CPRI
187	CP3145	YANA	PER	ICAR-CPRI
188	CP3153	TM-4	PER	ICAR-CPRI
189	CP3173	ELBA	POL	ICAR-CPRI
190	CP3180	ATOL	POL	ICAR-CPRI
191	CP3182	SANTA ANA	PER	ICAR-CPRI
192	CP3183	KORY SONQO	PER	ICAR-CPRI
193	CP3189	SISSAY	PER	ICAR-CPRI
194	CP3192	27/40	PER	ICAR-CPRI
195	CP3201	SAN JUAN	PER	ICAR-CPRI
196	CP3203	ROSLIN EBURU	PER	ICAR-CPRI
197	CP3211	IMILLA BLANCA	PER	ICAR-CPRI
198	CP3222	TPS	PER	ICAR-CPRI
199	CP3246	CIP 381381.13	PER	ICAR-CPRI
200	CP3256	CIP 381403.8	PER	ICAR-CPRI
201	CP3261	CIP 382122.15	PER	ICAR-CPRI
202	CP3274	CIP 384298.55	PER	ICAR-CPRI
203	CP3290	HOPE HELY	HUN	ICAR-CPRI
204	CP3296	TPS-67	PER	ICAR-CPRI
205	CP3318	XY.13	PER	ICAR-CPRI
206	CP3328	XY.12	PER	ICAR-CPRI
207	CP3329	YY.2	PER	ICAR-CPRI
208	CP3343	KWPTM29	PER	ICAR-CPRI
209	CP3352	(88146)	PER	ICAR-CPRI
210	CP3338	84.194.30	PER	ICAR-CPRI
211	CP3363	MF-II	PER	ICAR-CPRI
212	CP3453	VC24.16	PER	ICAR-CPRI
213	CP3414	CIP 380474.18	PER	ICAR-CPRI
214	CP3442	CIP 380426.1	PER	ICAR-CPRI
215	CP3443	CIP 380474.6	PER	ICAR-CPRI
216	CP3475	TS-6	PER	ICAR-CPRI
217	CP3486	TS-15	PER	ICAR-CPRI
218	CP3491	CFE-69-1	PER	ICAR-CPRI
219	CP3502	R4	PER	ICAR-CPRI
220	CP3505	R7	PER	ICAR-CPRI
221	CP3506	R8	PER	ICAR-CPRI
222	CP3511	R1R4	PER	ICAR-CPRI
223	CP3525	VDS-81	IND	ICAR-CPRI
224	CP3527	VDS-91	IND	ICAR-CPRI
225	CP3529	VDS-101	IND	ICAR-CPRI
226	CP3549	P67	PER	ICAR-CPRI
227	CP3575	LBR-30	PER	ICAR-CPRI
228	CP3577	E86.300	PER	ICAR-CPRI
229	CP3585	LBR-38	PER	ICAR-CPRI
230	CP3587	LBR-40	PER	ICAR-CPRI
231	CP3588	LBR-44	PER	ICAR-CPRI
232	CP3600	LBR-50	PER	ICAR-CPRI
233	CP3626	SUPER CHOLA	PER	ICAR-CPRI
234	CP3632	TIBATI	PER	ICAR-CPRI
235	CP3634	NDD277.2	PER	ICAR-CPRI
236	CP3636	KAGIRI	PER	ICAR-CPRI
237	CP3639	APC 1110	PER	ICAR-CPRI
238	CP3641	A81286-1	CAN	ICAR-CPRI
239	CP3646	KENNEBECK	CAN	ICAR-CPRI
240	CP3651	F88042	CAN	ICAR-CPRI
241	CP3652	CIP 284028.6	PER	ICAR-CPRI
242	CP3679	FBA-2	PER	ICAR-CPRI
243	CP3681	FLS-1	PER	ICAR-CPRI
244	CP3696	FLS-2	PER	ICAR-CPRI
245	CP3718	FLS-8	PER	ICAR-CPRI
246	CP3738	CUCHIRPA ISMAYNIN	PER	ICAR-CPRI
247	CP3761	CIP 392637.10	PER	ICAR-CPRI
248	CP3763	CIP 393077.159	PER	ICAR-CPRI
249	CP3768	CIP 393280.82	PER	ICAR-CPRI
250	CP3792	TARA CCALLO	PER	ICAR-CPRI
251	CP3795	HUACA COROTA	PER	ICAR-CPRI
252	CP3796	JANCKO FITU	PER	ICAR-CPRI
253	CP3797	PURCKA	PER	ICAR-CPRI
254	CP3799	SALLAMA	PER	ICAR-CPRI
255	CP3809	SENORITA	PER	ICAR-CPRI
256	CP3816	IV LBR-50	USA	ICAR-CPRI
257	CP3853	J/92-159	IND	ICAR-CPRI
258	CP3869	HT/92-802	IND	ICAR-CPRI
259	CP3880	KARNA	SWE	ICAR-CPRI
260	CP3881	97A-63	POL	ICAR-CPRI
261	CP3885	PITO	SWE	ICAR-CPRI
262	CP3891	J/92-13	IND	ICAR-CPRI
263	CP3893	KUFRI KHYATI	IND	ICAR-CPRI
264	CP3894	J/93-139	IND	ICAR-CPRI
265	CP3898	MS/95-1309	IND	ICAR-CPRI
266	CP3901	J/95-229	IND	ICAR-CPRI
267	CP3903	MP/97-583	IND	ICAR-CPRI
268	CP3917	HERMES	CHN	ICAR-CPRI
269	CP3939	RAIHUANA COLORADA	UNKNOWN	ICAR-CPRI
270	CP4052	92.118 X 92.187	PER	ICAR-CPRI
271	CP4096	FL 2053	USA	ICAR-CPRI
272	CP4149	UNKNOWN	PER	ICAR-CPRI
273	CP4179	CIP 397077.16	PER	ICAR-CPRI
274	CP4214	LAL SHIL	BGD	ICAR-CPRI
275	CP4224	A 96517-02	USA	ICAR-CPRI
276	CP4226	EGA 9706-14	USA	ICAR-CPRI
277	CP4242	BORA VALLE	USA	ICAR-CPRI
278	CP4254	BLISS	CHN	ICAR-CPRI
279	CP4256	LAY CLAIRE	CHN	ICAR-CPRI
280	CP4311	SARPO MIRA	DNK	ICAR-CPRI
281	CP4316		GDR	ICAR-CPRI
282	CP4398	CIP 304394.56	PER	ICAR-CPRI
283	JEX/A-10	Andigena	PER	ICAR-CPRI
284	JEX/A-1016	Andigena	PER	ICAR-CPRI
285	JEX/A-1046	Andigena	PER	ICAR-CPRI
286	JEX/A-1081	Andigena	PER	ICAR-CPRI
287	JEX/A-1092	Andigena	PER	ICAR-CPRI
288	JEX/A-1152	Andigena	PER	ICAR-CPRI
289	JEX/A-164	Andigena	PER	ICAR-CPRI
290	JEX/A-198	Andigena	PER	ICAR-CPRI
291	JEX/A-197	Andigena	PER	ICAR-CPRI
292	JEX/A-202	Andigena	PER	ICAR-CPRI
293	JEX/A-215	Andigena	PER	ICAR-CPRI
294	JEX/A-22	Andigena	PER	ICAR-CPRI
295	JEX/A-232	Andigena	PER	ICAR-CPRI
296	JEX/A-26	Andigena	PER	ICAR-CPRI
297	JEX/A-267	Andigena	PER	ICAR-CPRI
298	JEX/A-275	Andigena	PER	ICAR-CPRI
299	JEX/A-288	Andigena	PER	ICAR-CPRI
300	JEX/A-296	Andigena	PER	ICAR-CPRI
301	JEX/A-298	Andigena	PER	ICAR-CPRI
302	JEX/A-299	Andigena	PER	ICAR-CPRI
303	JEX/A-30	Andigena	PER	ICAR-CPRI
304	JEX/A-316	Andigena	PER	ICAR-CPRI
305	JEX/A-317	Andigena	PER	ICAR-CPRI
306	JEX/A-32	Andigena	PER	ICAR-CPRI
307	JEX/A-329	Andigena	PER	ICAR-CPRI
308	JEX/A-361	Andigena	PER	ICAR-CPRI
309	JEX/A-379	Andigena	PER	ICAR-CPRI
310	JEX/A-380	Andigena	PER	ICAR-CPRI
311	JEX/A-390	Andigena	PER	ICAR-CPRI
312	JEX/A-42	Andigena	PER	ICAR-CPRI
313	JEX/A-45	Andigena	PER	ICAR-CPRI
314	JEX/A-457	Andigena	PER	ICAR-CPRI
315	JEX/A-459	Andigena	PER	ICAR-CPRI
316	JEX/A-468	Andigena	PER	ICAR-CPRI
317	JEX/A-498	Andigena	PER	ICAR-CPRI
318	JEX/A-506	Andigena	PER	ICAR-CPRI
319	JEX/A-513	Andigena	PER	ICAR-CPRI
320	JEX/A-539	Andigena	PER	ICAR-CPRI
321	JEX/A-58	Andigena	PER	ICAR-CPRI
322	JEX/A-597	Andigena	PER	ICAR-CPRI
323	JEX/A-612	Andigena	PER	ICAR-CPRI
324	JEX/A-638	Andigena	PER	ICAR-CPRI
325	JEX/A-668	Andigena	PER	ICAR-CPRI
326	JEX/A-683	Andigena	PER	ICAR-CPRI
327	JEX/A-705	Andigena	PER	ICAR-CPRI
328	JEX/A-707	Andigena	PER	ICAR-CPRI
329	JEX/A-708	Andigena	PER	ICAR-CPRI
330	JEX/A-763	Andigena	PER	ICAR-CPRI
331	JEX/A-79	Andigena	PER	ICAR-CPRI
332	JEX/A-801	Andigena	PER	ICAR-CPRI
333	JEX/A-804	Andigena	PER	ICAR-CPRI
334	JEX/A-827	Andigena	PER	ICAR-CPRI
335	JEX/A-865	Andigena	PER	ICAR-CPRI
336	JEX/A-877	Andigena	PER	ICAR-CPRI
337	JEX/A-907	Andigena	PER	ICAR-CPRI
338	JEX/A-912	Andigena	PER	ICAR-CPRI
339	JEX/A-918	Andigena	PER	ICAR-CPRI
340	JEX/A-920	Andigena	PER	ICAR-CPRI
341	JEX/A-93	Andigena	PER	ICAR-CPRI
342	JEX/A-947	Andigena	PER	ICAR-CPRI
343	JEX/A-99	Andigena	PER	ICAR-CPRI
344	CP2141	KUFRI CHANDRAMUKHI	IND	ICAR-CPRI
345	CP3595	KUFRI ANAND	IND	ICAR-CPRI
346	CP4068	Kufri Arun	IND	ICAR-CPRI
347	CP3399	KUFRI ASHOKA	IND	ICAR-CPRI
348	CP2138	KUFRI BADSHAH	IND	ICAR-CPRI
349	CP2139	KUFRI BAHAR	IND	ICAR-CPRI
350	CP3404	KUFRI CHIPSONA 1	IND	ICAR-CPRI
351	CP4069	KUFRI CHIPSONA 3	IND	ICAR-CPRI
352	CP3896	KUFRI FRYSONA	IND	ICAR-CPRI
353	CP4115	Kufri Garima	IND	ICAR-CPRI
354	CP3861	Kufri Gaurav	IND	ICAR-CPRI
355	CP4105	KUFRI GIRDHARI	IND	ICAR-CPRI
356	CP4070	KUFRI HIMALINI	IND	ICAR-CPRI
357	CP2144	KUFRI JYOTI	IND	ICAR-CPRI
358	CP3398	KUFRI KANCHAN	IND	ICAR-CPRI
359	CP4424	Kufri Karan	IND	ICAR-CPRI
360	CP2150	KUFRI LAUVKAR	IND	ICAR-CPRI
361	CP3406	KUFRI MEGHA	IND	ICAR-CPRI
362	CP4073	KUFRI PUSHKAR	IND	ICAR-CPRI
363	CP4098	KUFRI SADABAHAR	IND	ICAR-CPRI
364	CP2158	KUFRI SINDHURI	IND	ICAR-CPRI
365	CP2288	Kufri Swarna	IND	ICAR-CPRI
366	CP4072	KUFRI SURYA	IND	ICAR-CPRI
367	CP3402	KUFRI PUKHRAJ	IND	ICAR-CPRI
