# Supplementary material for: Genome-wide association mapping and genomic prediction for late blight and potato cyst nematode resistance in potato (Solanum tuberosum L.)
Source: Front Plant Sci. 2023 Oct 4;14:1211472. doi: 10.3389/fpls.2023.1211472 (PMC10582711; doi:10.3389/fpls.2023.1211472)
Supplement: Supplementary file 2 [file Table_2.xlsx]

## Sheet: genotyped accessions
Table S1b: Details of the accessions used for genotyping
Name	CIPNUMBER	VARIETY NAME	Country	Source
CP658		UNKNOWN	UNKNOWN	ICAR-CPRI
CP659		UNKNOWN	UNKNOWN	ICAR-CPRI
CP1012		UNKNOWN	UNKNOWN	ICAR-CPRI
CP1137		UNKNOWN	UNKNOWN	ICAR-CPRI
CP1151		UNKNOWN	UNKNOWN	ICAR-CPRI
CP1159		UNKNOWN	UNKNOWN	ICAR-CPRI
CP1175		UNKNOWN	UNKNOWN	ICAR-CPRI
CP1177		UNKNOWN	UNKNOWN	ICAR-CPRI
CP1187		UNKNOWN	UNKNOWN	ICAR-CPRI
CP1225		UNKNOWN	UNKNOWN	ICAR-CPRI
CP1235		UNKNOWN	UNKNOWN	ICAR-CPRI
CP1246		UNKNOWN	UNKNOWN	ICAR-CPRI
CP1325		UNKNOWN	UNKNOWN	ICAR-CPRI
CP1330		UNKNOWN	UNKNOWN	ICAR-CPRI
CP1348		ADINA	AUS	ICAR-CPRI
CP1367		B922-6	USA	ICAR-CPRI
CP1368		B3428-20	USA	ICAR-CPRI
CP1379		96-56	USA	ICAR-CPRI
CP1390		B 3620-1	USA	ICAR-CPRI
CP1399		ARI	NET	ICAR-CPRI
CP1411		GLORIA	NET	ICAR-CPRI
CP1414		IRENE	NET	ICAR-CPRI
CP1426		PROF.BROEKEMA	NET	ICAR-CPRI
CP1427		PROFIJT	NET	ICAR-CPRI
CP1431		RIVAL	NET	ICAR-CPRI
CP1433		SIENTJE	NET	ICAR-CPRI
CP1435		TEDRIA	NET	ICAR-CPRI
CP1440		BD-1456c(1)	UK	ICAR-CPRI
CP1447		CONCHITA	UK	ICAR-CPRI
CP1450		SACO	NZE	ICAR-CPRI
CP1453		AMSEL	GDR	ICAR-CPRI
CP1454		ARGO	GDR	ICAR-CPRI
CP1462		SPATZ	GDR	ICAR-CPRI
CP1470		JIIUECA	USR	ICAR-CPRI
CP1479		B-751-119	USA	ICAR-CPRI
CP1491		BD3053-18	USA	ICAR-CPRI
CP1529		2305a(10)	UK	ICAR-CPRI
CP1533		2601d(22)	UK	ICAR-CPRI
CP1544		ASOKA	NET	ICAR-CPRI
CP1545		SASKIA	NET	ICAR-CPRI
CP1553		CX737-579	NOR	ICAR-CPRI
CP1555		PIMPERNELX 42NO.174	NOR	ICAR-CPRI
CP1564		B4829-7	USA	ICAR-CPRI
CP1571		B5036-40	USA	ICAR-CPRI
CP1581		PI222948	USA	ICAR-CPRI
CP1588		COSIMA	GFR	ICAR-CPRI
CP1602		B5030-10	USA	ICAR-CPRI
CP1633		2182ef(7)	UK	ICAR-CPRI
CP1642		TONDRA	GFR	ICAR-CPRI
CP1646		MPI52.504	GFR	ICAR-CPRI
CP1659		ECLIPSE	UK	ICAR-CPRI
CP1664		ROYAL KIDNEY	UK	ICAR-CPRI
CP1669		ANTINEMA	GFR	ICAR-CPRI
CP1672		ULSTER TORCH	IRE	ICAR-CPRI
CP1674		BRASOVEAN	ROM	ICAR-CPRI
CP1687		GREEN MOUNTAIN	CAN	ICAR-CPRI
CP1688		HUNTER	CAN	ICAR-CPRI
CP1689		HURON	CAN	ICAR-CPRI
CP1700		AURA	FRA	ICAR-CPRI
CP1706		FARFADETTE	FRA	ICAR-CPRI
CP1710		KER PONDY	FRA	ICAR-CPRI
CP1711		MADOZ	FRA	ICAR-CPRI
CP1747		EARLY GEM	USA	ICAR-CPRI
CP1749		KENNEBEC	USA	ICAR-CPRI
CP1753		MERRIMACK	USA	ICAR-CPRI
CP1764		RUSSET RURAL	USA	ICAR-CPRI
CP1771		US SD.41956	USA	ICAR-CPRI
CP1800		318.1	USA	ICAR-CPRI
CP1806		TUNIKA	GDR	ICAR-CPRI
CP1846		CHIEFTAIN	USA	ICAR-CPRI
CP1871		4085(6)	UK	ICAR-CPRI
CP1873		GARMA	AFG	ICAR-CPRI
CP1889		B 5665-7	USA	ICAR-CPRI
CP1922		B 6603-12	USA	ICAR-CPRI
CP1926		B 6712-2	USA	ICAR-CPRI
CP1947		1512c(16)	UK	ICAR-CPRI
CP1971	800943	SATURNA	NET	ICAR-CPRI
CP1982		SAPHIR	GFR	ICAR-CPRI
CP1989		68.625/74	GFR	ICAR-CPRI
CP1990		H-345VD(F)8749B	GFR	ICAR-CPRI
CP2030		G 6246	PER	ICAR-CPRI
CP2049	720091	MEX-32	PER	ICAR-CPRI
CP2059	379389	CIP379389	PER	ICAR-CPRI
CP2065	800226	BR 69.84	PER	ICAR-CPRI
CP2071	800212	BR63-5	PER	ICAR-CPRI
CP2110	720084	CFK69.1	PER	ICAR-CPRI
CP2118		DESIREE	NET	ICAR-CPRI
CP2138		KUFRI BADSHAH	IND	ICAR-CPRI
CP2139		KUFRI BAHAR	IND	ICAR-CPRI
CP2141		KUFRI CHANDRAMUKHI	IND	ICAR-CPRI
CP2142		KUFRI DEWA	IND	ICAR-CPRI
CP2144		KUFRI JYOTI	IND	ICAR-CPRI
CP2149		KUFRI LALIMA	IND	ICAR-CPRI
CP2150		KUFRI LAUVKAR	IND	ICAR-CPRI
CP2158		KUFRI SINDHURI	IND	ICAR-CPRI
CP2163	720118	CRUZA148	PER	ICAR-CPRI
CP2183	676008	I-1039	PER	ICAR-CPRI
CP2189		CI-4-343	USA	ICAR-CPRI
CP2224		UNKNOWN	UNKNOWN	ICAR-CPRI
CP2235		U 567/33	USA	ICAR-CPRI
CP2284		BREMER	AUS	ICAR-CPRI
CP2324	702937	UGRO-SHIRI	PER	ICAR-CPRI
CP2338	800966	PRISCA	PER	ICAR-CPRI
CP2346	377427.1	F-6	PER	ICAR-CPRI
CP2348		STINA	SWE	ICAR-CPRI
CP2350		GEMSEG	CAN	ICAR-CPRI
CP2370	378711.5	MUZIRANZARA	PER	ICAR-CPRI
CP2385	676028	AND-69-1	PER	ICAR-CPRI
CP2399	701266	LLAMEINA BLANCA	PER	ICAR-CPRI
CP2412	720097	MURCA	PER	ICAR-CPRI
CP2418	720130	CHIQUITA	PER	ICAR-CPRI
CP2927	UNKNOWN	UNKNOWN	PER	ICAR-CPRI
CP3068	720031	ICA NEVADA	PER	ICAR-CPRI
CP3079		BINTJE	PER	ICAR-CPRI
CP3081		2070(54)	GFR	ICAR-CPRI
CP3091		NICOLA	NET	ICAR-CPRI
CP3096	703350	CURIPAMBA	PER	ICAR-CPRI
CP3096_1	703350	CURIPAMBA	PER	ICAR-CPRI
CP3098	379420.1	27/15	PER	ICAR-CPRI
CP3102	703310	LINLESH	PER	ICAR-CPRI
CP3103	703287	AZUL SOUCCO	PER	ICAR-CPRI
CP3116	700602	EE-786	PER	ICAR-CPRI
CP3124	379676.3	CIP 379676.3	PER	ICAR-CPRI
CP3173		ELBA	POL	ICAR-CPRI
CP3180		ATOL	POL	ICAR-CPRI
CP3189	378501.16	SISSAY	PER	ICAR-CPRI
CP3201	800977	SAN JUAN	PER	ICAR-CPRI
CP3256	381403.8	CIP 381403.8	PER	ICAR-CPRI
CP3290		HOPE HELY	HUN	ICAR-CPRI
CP3328	386615.12	XY.12	PER	ICAR-CPRI
CP3329	387540.2	YY.2	PER	ICAR-CPRI
CP3338	590007.30	84.194.30	PER	ICAR-CPRI
CP3343	590011.29	KWPTM29	PER	ICAR-CPRI
CP3352	382197.7	(88146)	PER	ICAR-CPRI
CP3363	82010.2	MF-II	PER	ICAR-CPRI
CP3398		KUFRI KANCHAN	IND	ICAR-CPRI
CP3399		KUFRI ASHOKA	IND	ICAR-CPRI
CP3402		KUFRI PUKHRAJ	IND	ICAR-CPRI
CP3404		KUFRI CHIPSONA 1	IND	ICAR-CPRI
CP3406		KUFRI MEGHA	IND	ICAR-CPRI
CP3442	380426.1	CIP 380426.1	PER	ICAR-CPRI
CP3453	380605.16	VC24.16	PER	ICAR-CPRI
CP3453_1	380605.16	VC24.16	PER	ICAR-CPRI
CP3486	389429.31	TS-15	PER	ICAR-CPRI
CP3505	801045	R7	PER	ICAR-CPRI
CP3527		VDS-91	IND	ICAR-CPRI
CP3575	386209.15	LBR-30	PER	ICAR-CPRI
CP3595		KUFRI ANAND	IND	ICAR-CPRI
CP3626	720171	SUPER CHOLA	PER	ICAR-CPRI
CP3634	801009	NDD277.2	PER	ICAR-CPRI
CP3639	801036	APC 1110	PER	ICAR-CPRI
CP3641		A81286-1	CAN	ICAR-CPRI
CP3646		KENNEBECK	CAN	ICAR-CPRI
CP3651		F88042	CAN	ICAR-CPRI
CP3652	284028.6	CIP 284028.6	PER	ICAR-CPRI
CP3679	384008.5	FBA-2	PER	ICAR-CPRI
CP3681	384068.17	FLS-1	PER	ICAR-CPRI
CP3696	384091.11	FLS-2	PER	ICAR-CPRI
CP3718	385110.42	FLS-8	PER	ICAR-CPRI
CP3763	393077.159	CIP 393077.159	PER	ICAR-CPRI
CP3792	702248	TARA CCALLO	PER	ICAR-CPRI
CP3795	702543	HUACA COROTA	PER	ICAR-CPRI
CP3797	702580	PURCKA	PER	ICAR-CPRI
CP3799	702587	SALLAMA	PER	ICAR-CPRI
CP3809	703151	SENORITA	PER	ICAR-CPRI
CP3853		J/92-159	IND	ICAR-CPRI
CP3861	JX-576	Kufri Gaurav	IND	ICAR-CPRI
CP3869		HT/92-802	IND	ICAR-CPRI
CP3891		J/92-13	IND	ICAR-CPRI
CP3893		KUFRI KHYATI	IND	ICAR-CPRI
CP3896		KUFRI FRYSONA	IND	ICAR-CPRI
CP3898		MS/95-1309	IND	ICAR-CPRI
CP3917		HERMES	CHN	ICAR-CPRI
CP3939	703285	RAIHUANA COLORADA	UNKNOWN	ICAR-CPRI
CP4052	397029.21	92.118 X 92.187	PER	ICAR-CPRI
CP4069		KUFRI CHIPSONA 3	IND	ICAR-CPRI
CP4070		KUFRI HIMALINI	IND	ICAR-CPRI
CP4072		KUFRI SURYA	IND	ICAR-CPRI
CP4073		KUFRI PUSHKAR	IND	ICAR-CPRI
CP4096		FL 2053	USA	ICAR-CPRI
CP4098		KUFRI SADABAHAR	IND	ICAR-CPRI
CP4105		KUFRI GIRDHARI	IND	ICAR-CPRI
CP4115	MS/99-1871	Kufri Garima	IND	ICAR-CPRI
CP4149	700173	UNKNOWN	PER	ICAR-CPRI
CP4179	397077.16	CIP 397077.16	PER	ICAR-CPRI
CP4214	709004	LAL SHIL	BGD	ICAR-CPRI
CP4224		A 96517-02	USA	ICAR-CPRI
CP4226		EGA 9706-14	USA	ICAR-CPRI
CP4242		BORA VALLE	USA	ICAR-CPRI
CP4254		BLISS	CHN	ICAR-CPRI
CP4256		LAY CLAIRE	CHN	ICAR-CPRI
CP4311		SARPO MIRA	DNK	ICAR-CPRI
CP4316		UNKNOWN	GDR	ICAR-CPRI
JEX/A-10		Andigena	Peru	ICAR-CPRI
JEX/A-1046		Andigena	Peru	ICAR-CPRI
JEX/A-1081		Andigena	Peru	ICAR-CPRI
JEX/A-1092		Andigena	Peru	ICAR-CPRI
JEX/A-164		Andigena	Peru	ICAR-CPRI
JEX/A-197		Andigena	Peru	ICAR-CPRI
JEX/A-198		Andigena	Peru	ICAR-CPRI
JEX/A-202		Andigena	Peru	ICAR-CPRI
JEX/A-215		Andigena	Peru	ICAR-CPRI
JEX/A-275		Andigena	Peru	ICAR-CPRI
JEX/A-296		Andigena	Peru	ICAR-CPRI
JEX/A-298		Andigena	Peru	ICAR-CPRI
JEX/A-30		Andigena	Peru	ICAR-CPRI
JEX/A-316		Andigena	Peru	ICAR-CPRI
JEX/A-329		Andigena	Peru	ICAR-CPRI
JEX/A-379		Andigena	Peru	ICAR-CPRI
JEX/A-380		Andigena	Peru	ICAR-CPRI
JEX/A-42		Andigena	Peru	ICAR-CPRI
JEX/A-457		Andigena	Peru	ICAR-CPRI
JEX/A-468		Andigena	Peru	ICAR-CPRI
JEX/A-498		Andigena	Peru	ICAR-CPRI
JEX/A-506		Andigena	Peru	ICAR-CPRI
JEX/A-513		Andigena	Peru	ICAR-CPRI
JEX/A-539		Andigena	Peru	ICAR-CPRI
JEX/A-668		Andigena	Peru	ICAR-CPRI
JEX/A-763		Andigena	Peru	ICAR-CPRI
JEX/A-804		Andigena	Peru	ICAR-CPRI
JEX/A-877		Andigena	Peru	ICAR-CPRI
JEX/A-947		Andigena	Peru	ICAR-CPRI
